# Supplementary material for: Sexual excitation induces courtship ultrasonic vocalizations and cataplexy-like behavior in orexin neuron-ablated male mice
Source: PubMed Central journal article supplement (PMC7864915; doi:10.1038/s42003-021-01696-z), 2021-02-05
Supplement: 42003_2021_1696_MOESM2_ESM.pdf [file 42003_2021_1696_MOESM2_ESM.pdf]

## Description of Additional Supplementary Files

**File name:** Supplemental Movie 1 & 2. Representative video showing sonogram of ultrasonic vocalizations (USVs) and cataplexy-like attack

**Description:** Upper: Scrolling sonogram. The vertical axis shows the frequency of the recorded sound and the horizontal axis shows the elapsed time. Lower: Animal behavior taken from a video camera attached to the ceiling of the soundproof box. The mouse with brown fur is an orexin neuron-ablated male mouse and the mouse with black fur is a female C57BL/6J

**File name:** Supplementary Data 1

**Description:** Dataset used to make figures reported in the paper
